# Supplementary material
Source: PubMed Central journal article supplement (PMC10992213)

Figure 3A  
A549 with M0\_HSF1

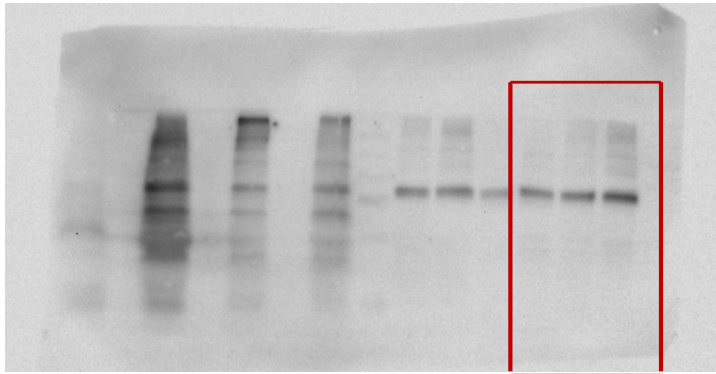

A549 with M0\_  
Hsp70 and tubulin

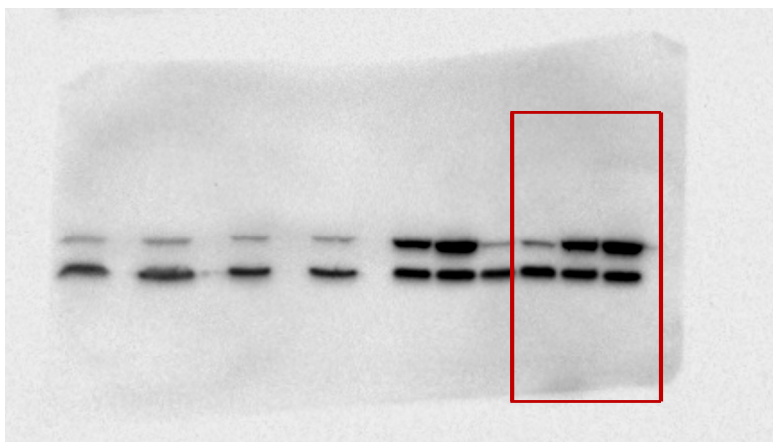

DLD1 with M0\_HSF1

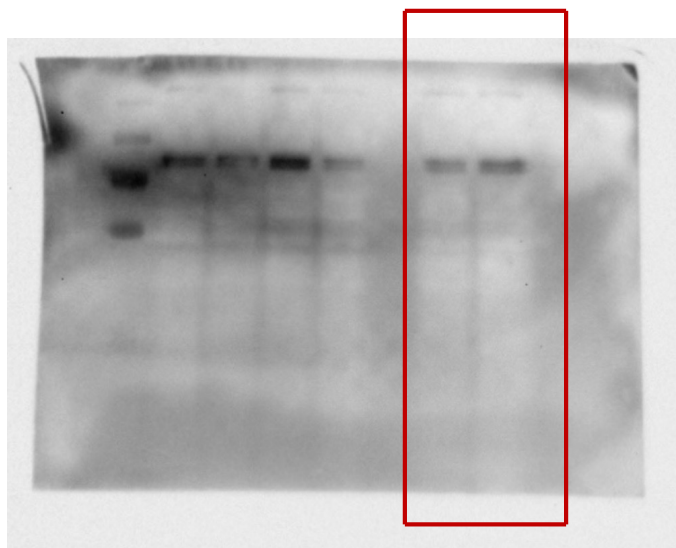

DLD1 with THP1\_  
Hsp70 and GAPDH

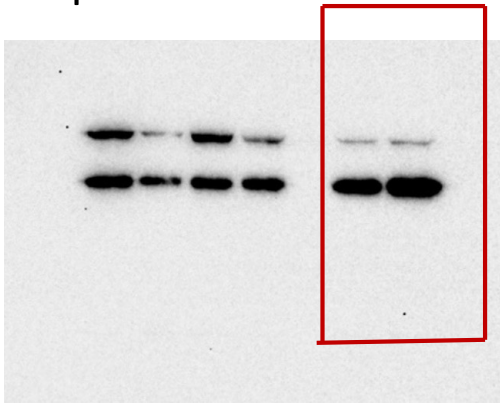

A549 with THP1\_  
pHSF1

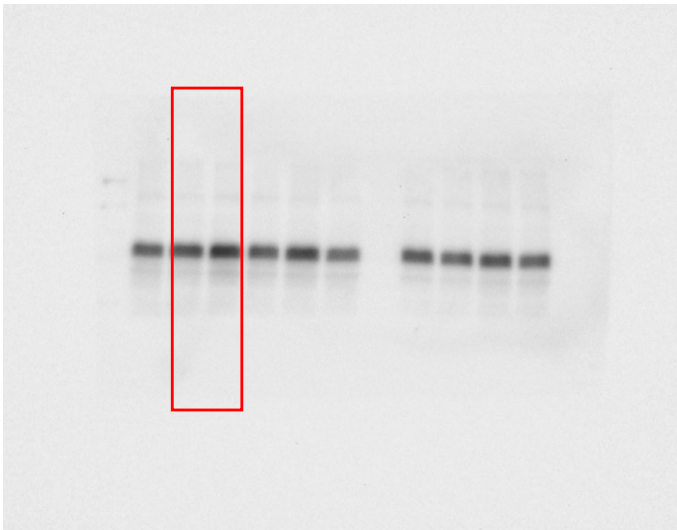

A549 with THP1\_  
Hsp70 tub

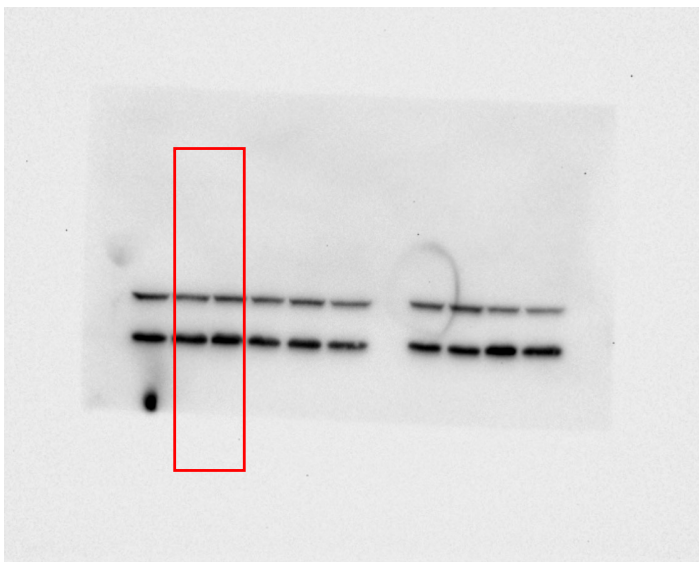

Figure 4A

HCC6 with THP1\_ HSF1

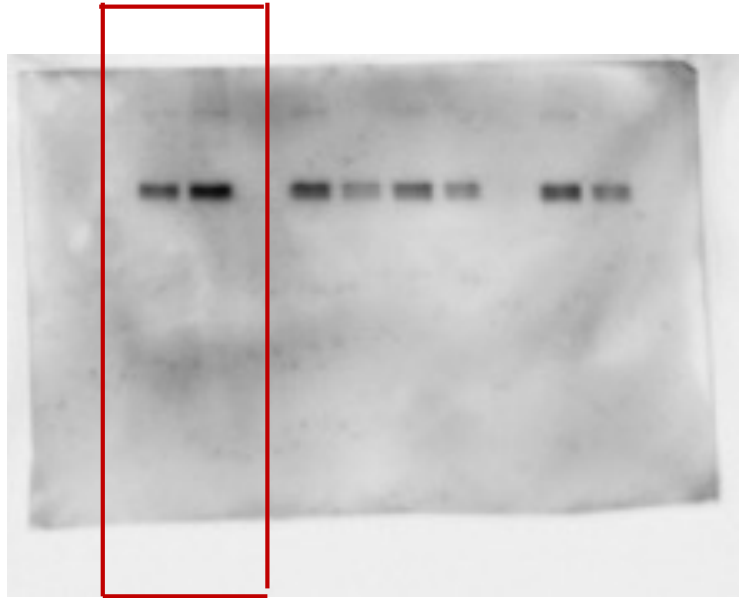

HCC6 with THP1\_ Hsp70 and  $\beta$ -tubulin

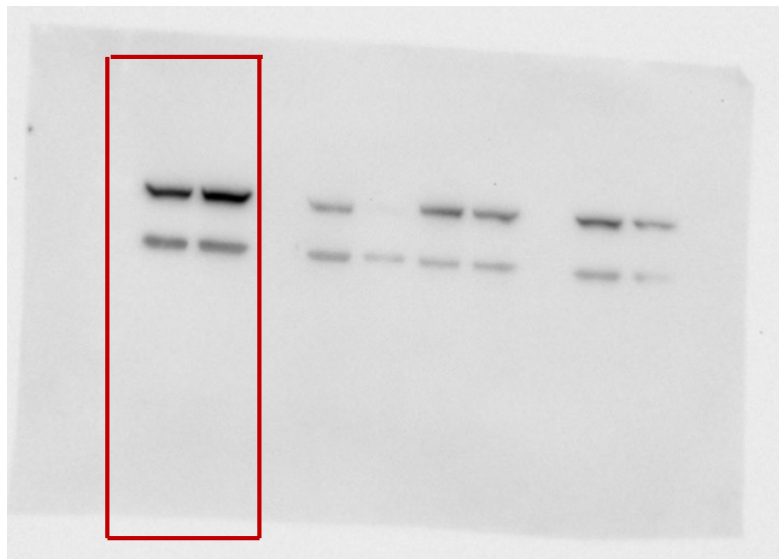

HCC7 with THP1 \_ HSF1

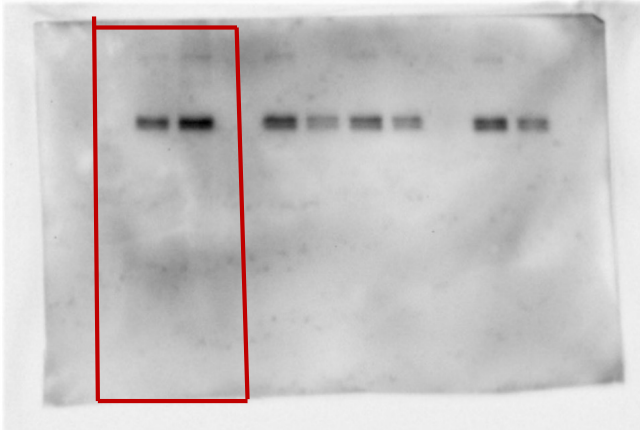

HCC7 with THP1\_Hsp70 and  $\beta$ -tubulin

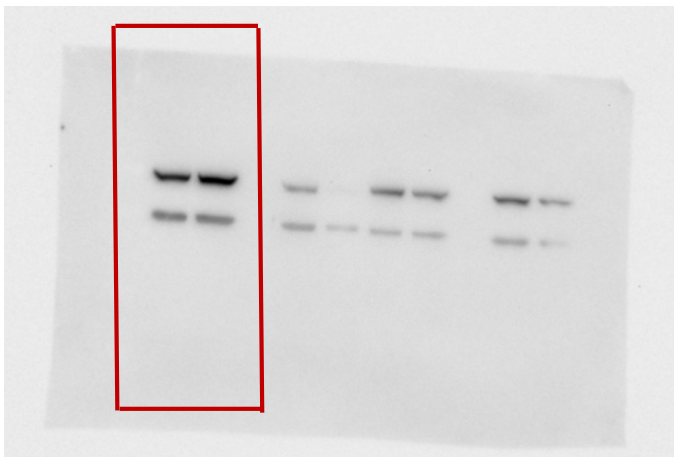

HCC9 with THP1\_HSF1

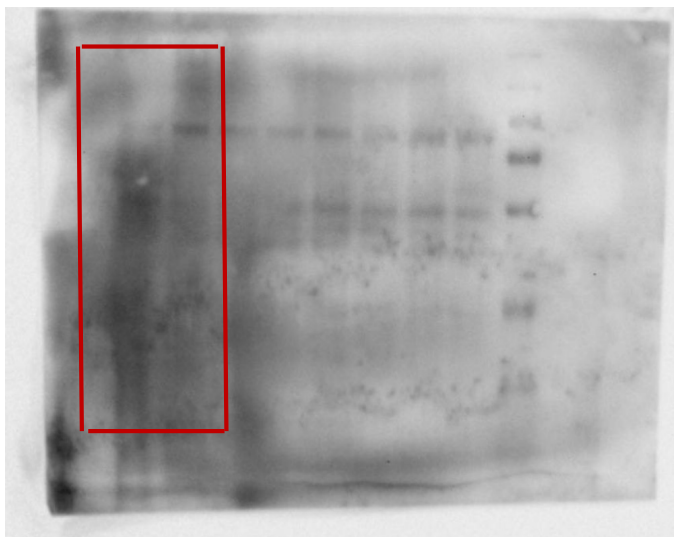

HCC9 with THP1 \_Hsp70 and  $\beta$ -tubulin

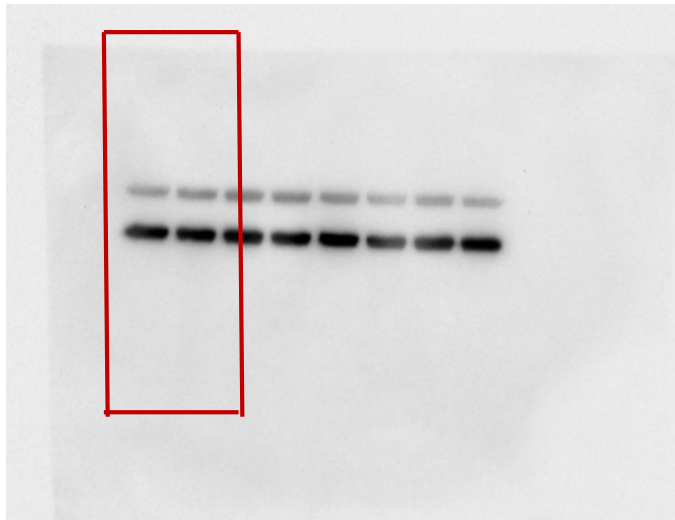

HCCs with M0 \_HSF1

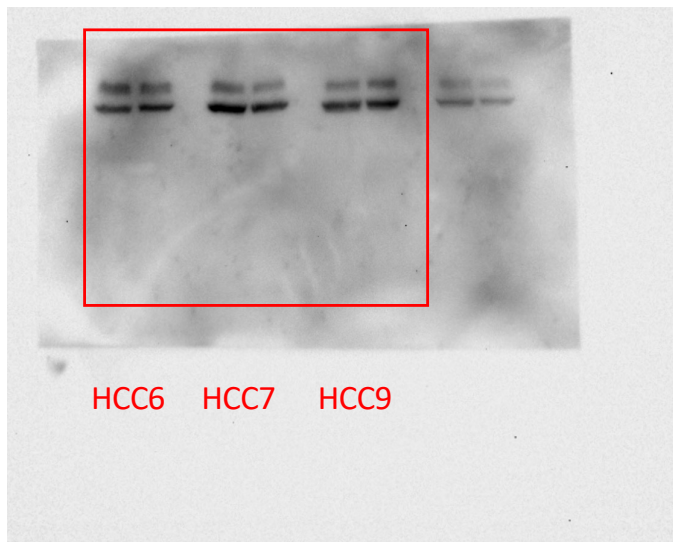

HCCs with M0 \_Hsp70 and  $\beta$ -tubulin

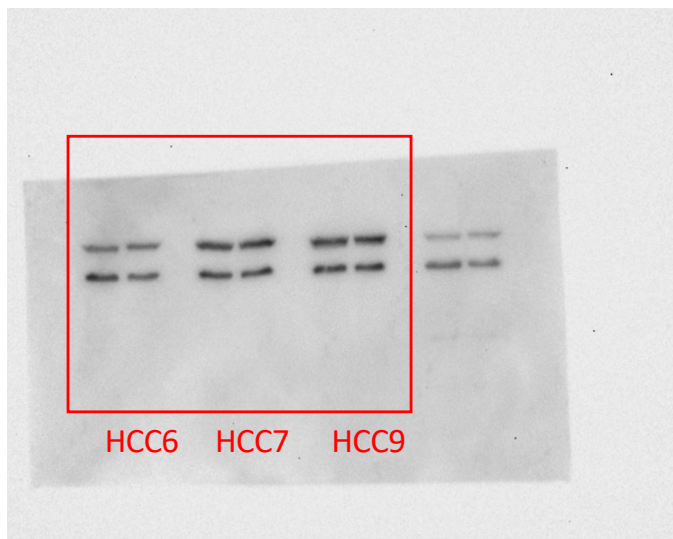

Figure 4C

HCC6 time points \_ pHSF1

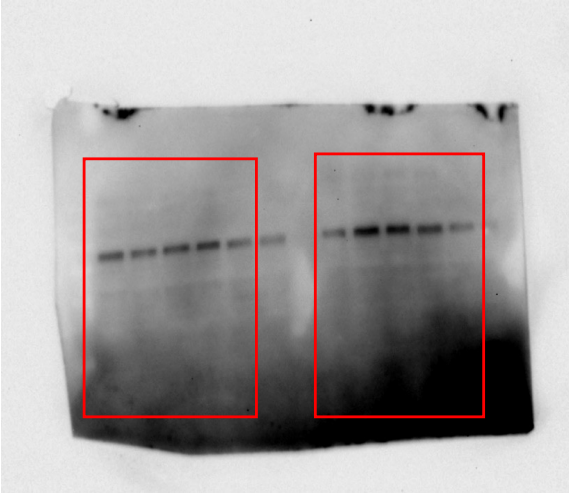

HCC6 time points \_  $\beta$ -tubulin

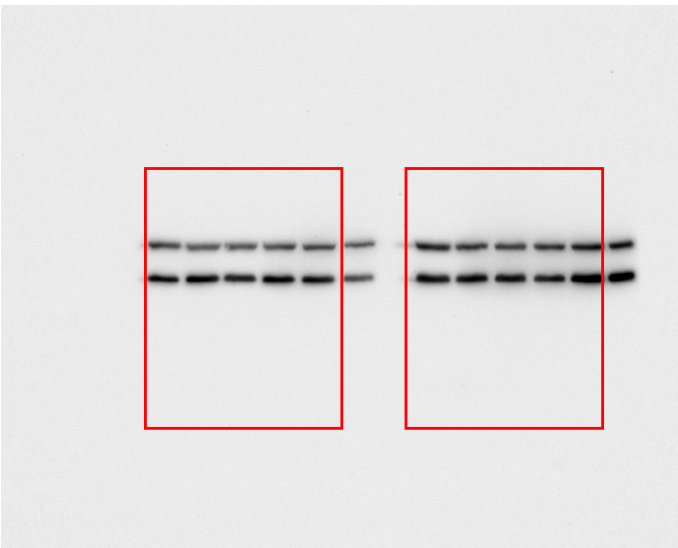

HCC6 time points \_ tHSF1

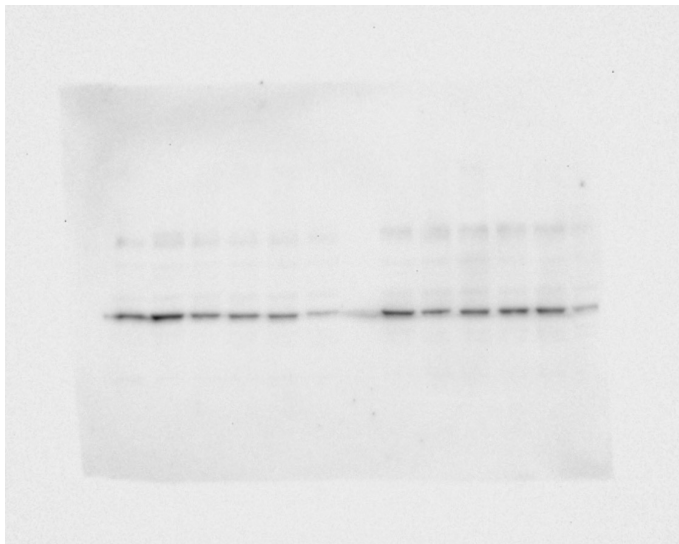



Figure 6A

A549kdHSF1 and A549 scr with THP1 \_ pHSF1

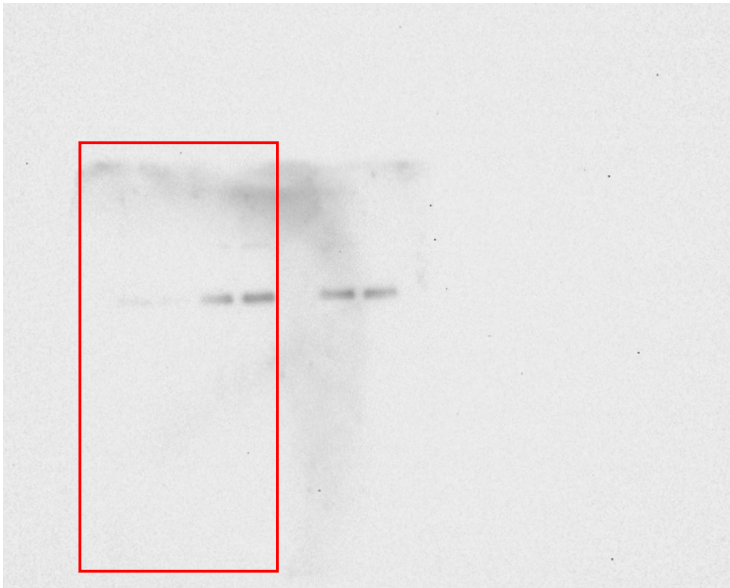

A549kdHSF1 and A549 scr with THP1 \_ Hsp70 and  $\beta$ -tubulin

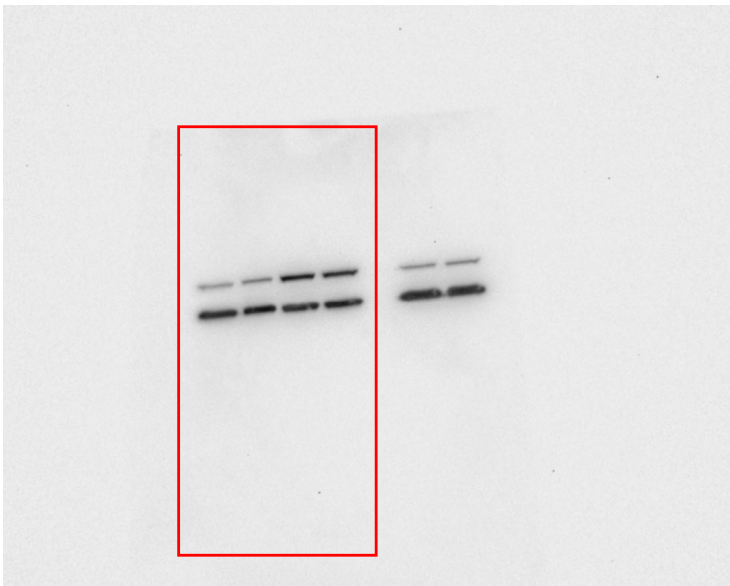

A549kdHSF1 and A549 scr with THP1 \_ tHSF1 and  $\beta$ -tubulin

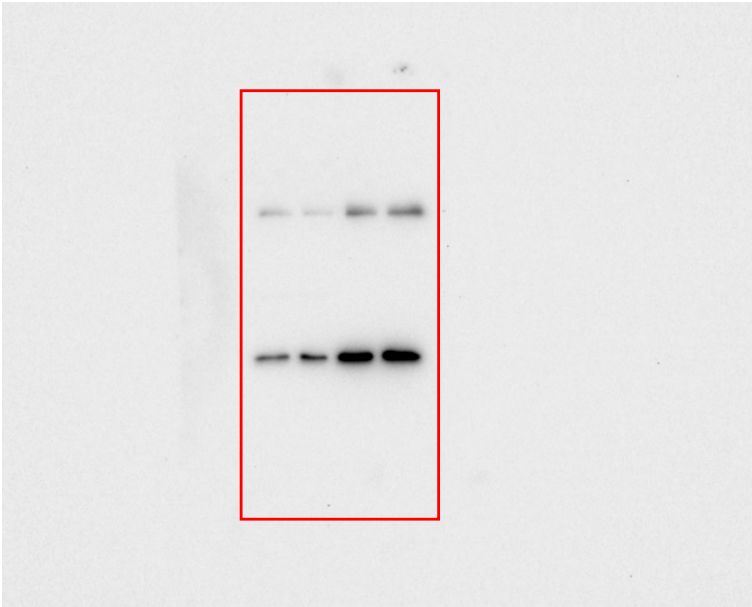

Figure 7A

HCCs with THP1 and CL43 \_ Hsp70 and  $\beta$ -tubulin

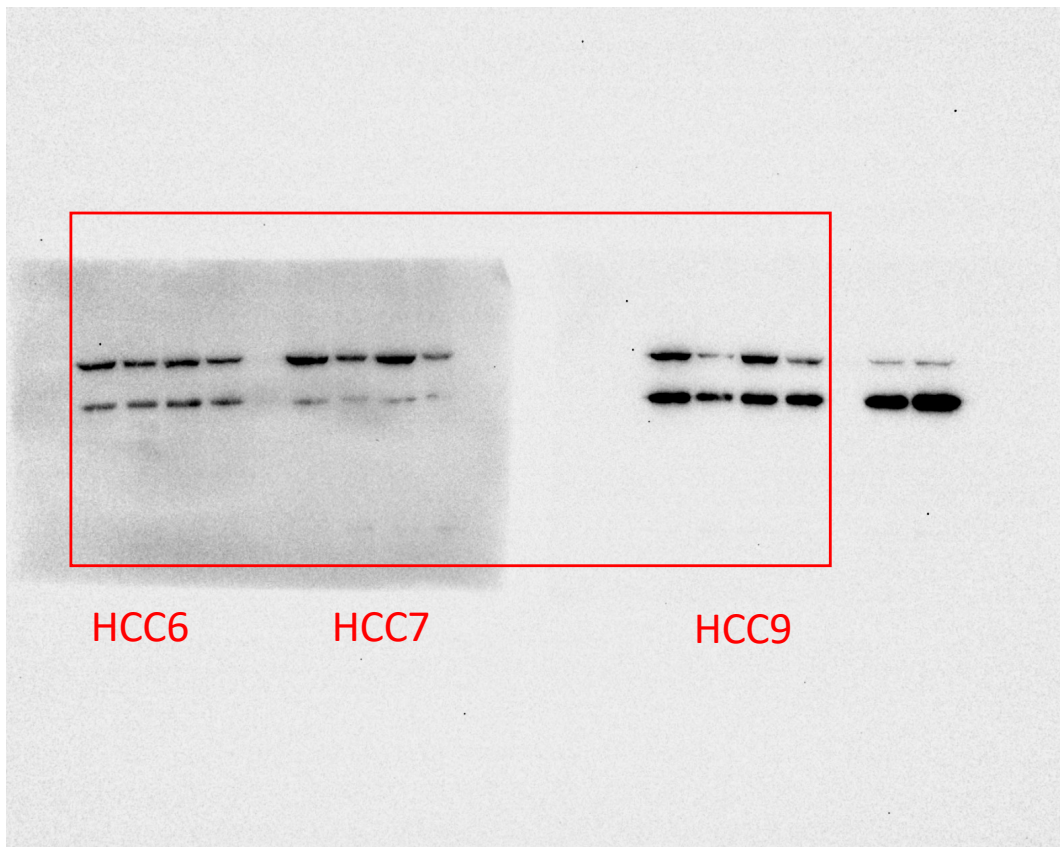



HCC9 with THP1 and CL43 \_ pHSF1

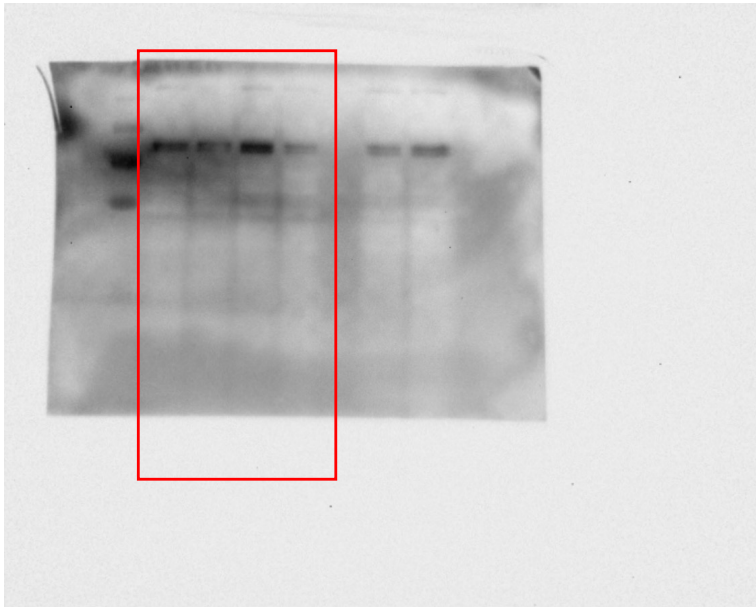

HCC6 and HCC7 with THP1 and CL43 \_ pHSF1

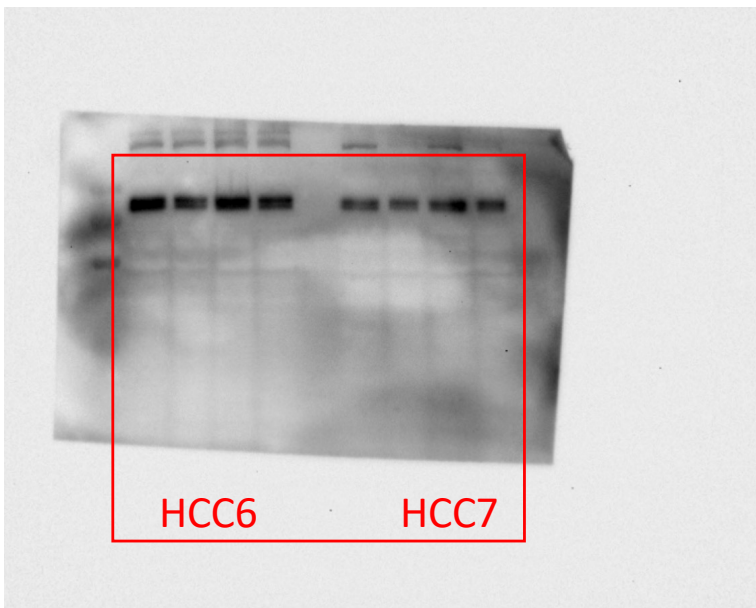

Supplement: 262_2023_3612_MOESM2_ESM.pdf [file 262_2023_3612_MOESM2_ESM.pdf]
